# Supplementary material for: An alternative method for correcting fluorescence quenching
Source: Copernicus journal article supplement (doi:10.5194/os-11-83-2015), 2015-01-13
Supplement: Supplementary file 1 [file os-11-83-2015-supplement.pdf]

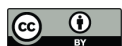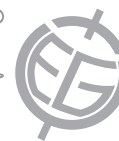

*Supplement of*

## **An alternative method for correcting fluorescence quenching**

**L. Biermann et al.**

*Correspondence to:* L. Biermann (lb66@st-andrews.ac.uk)

## Supplementary Figures

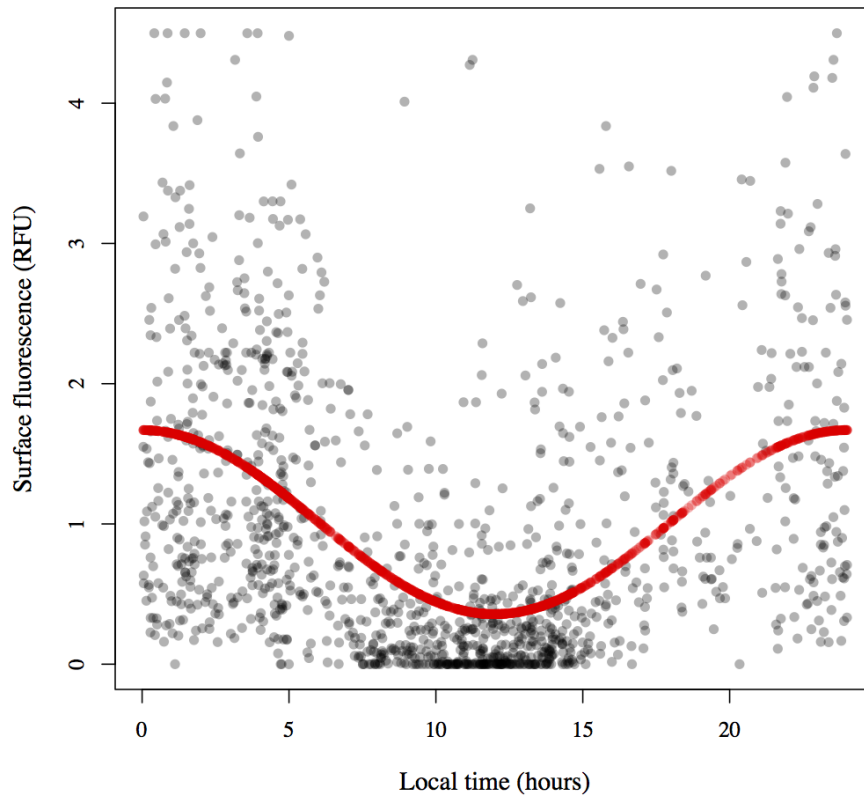

Supplementary Figure 1: Uncorrected surface fluorescence data (top 10m) collected by 19 animal-borne fluorometers over successive austral summers. Fitted sin wave in red illustrates how yield is significantly suppressed around midday. ( $n = 1267$ ,  $R^2 = 0.26$ ,  $P < 0.001$ ).

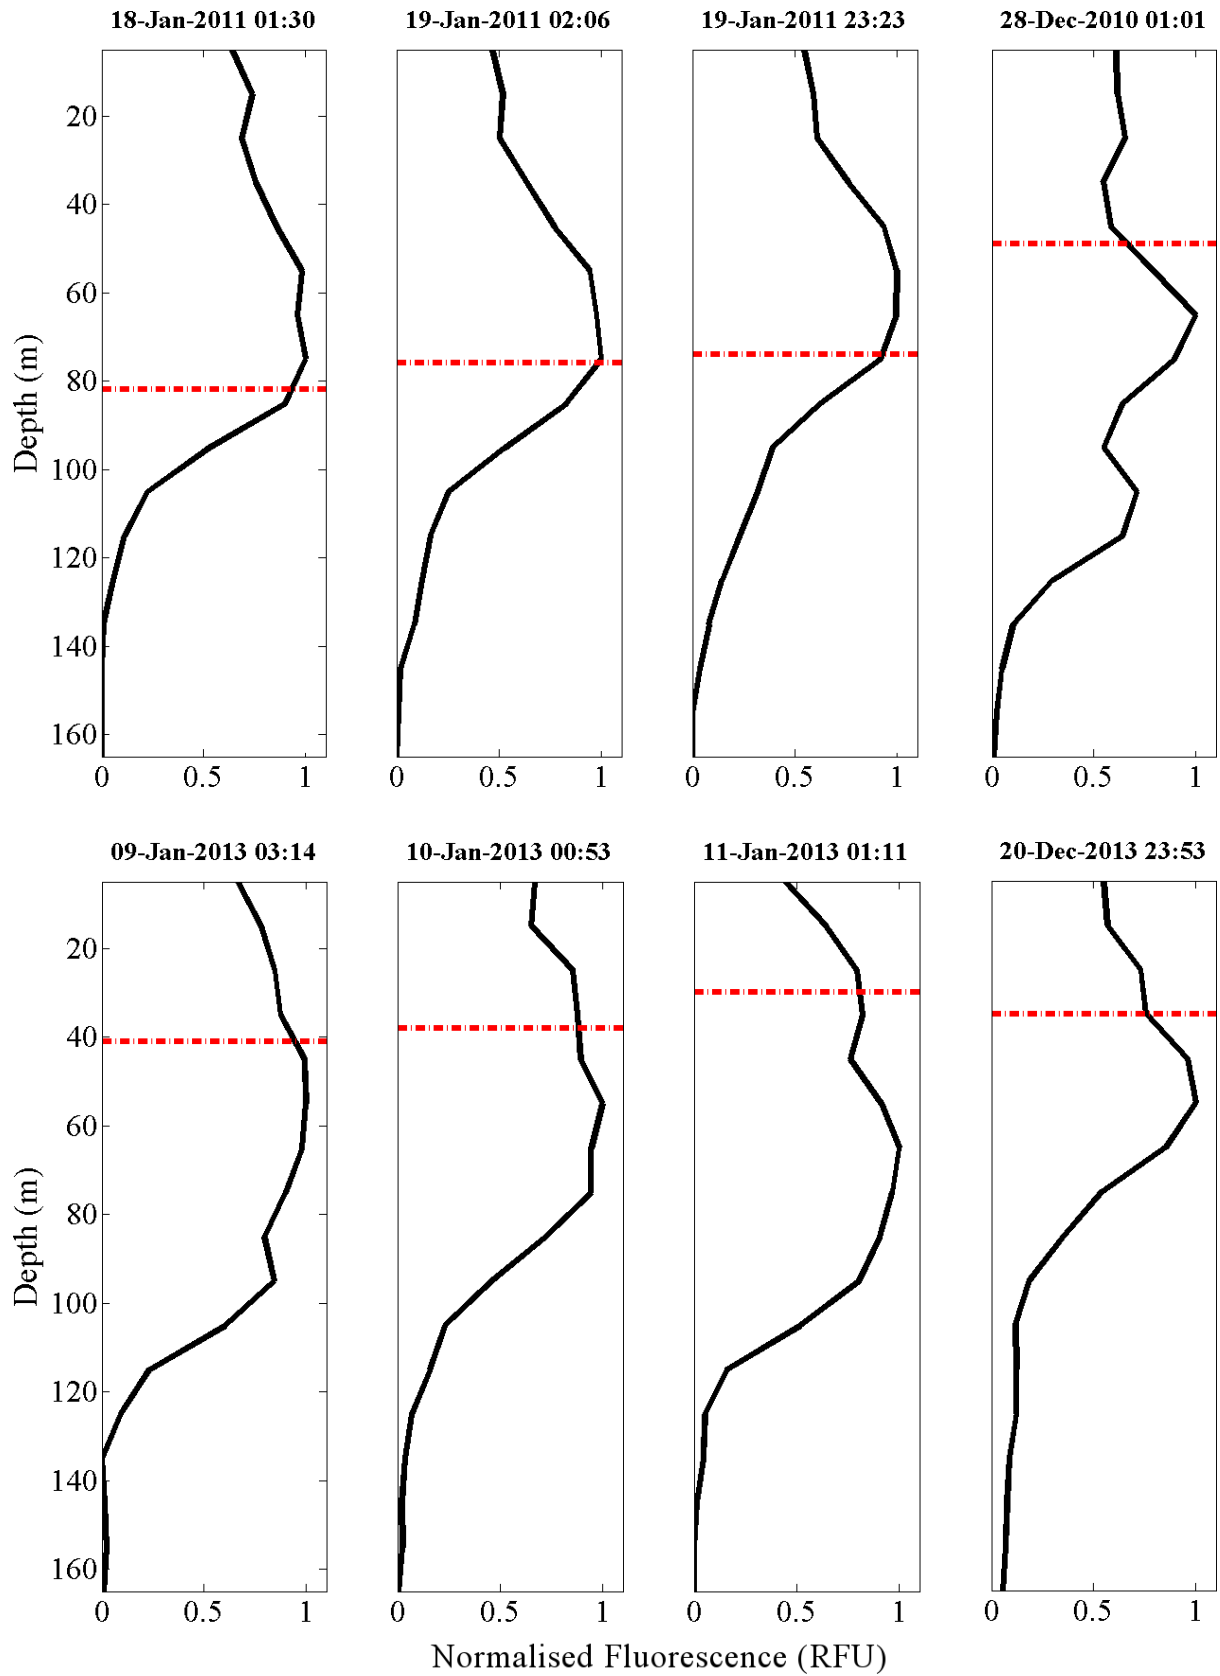

Supplementary Figure 2: Examples of discrete vertical profiles of night (unquenched) fluorescence (solid black line) collected by instrumented elephant seals in the Southern Ocean. The depth of the density-derived mixed layer is shown by the dashed red line.

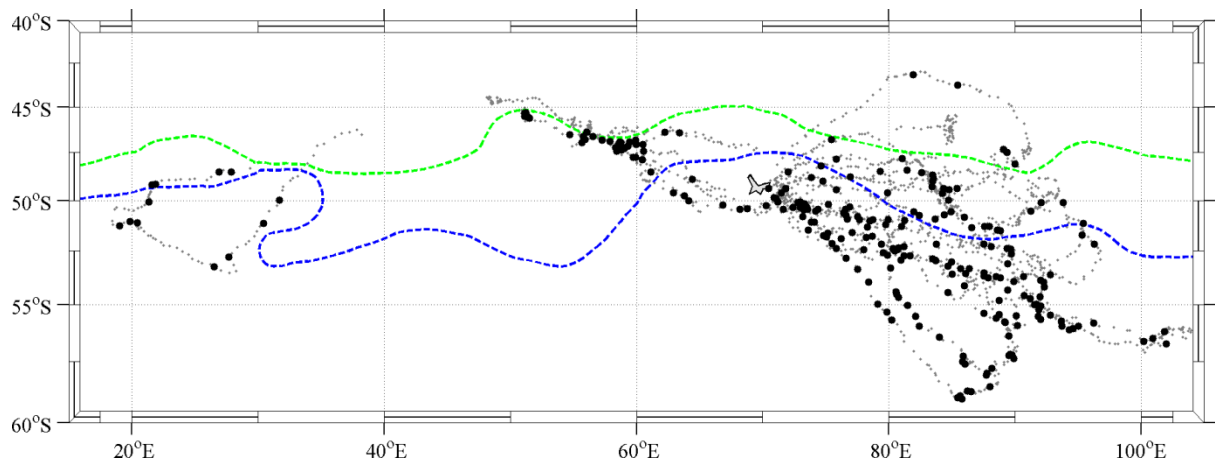

Supplementary Figure 3: Positions of the night (unquenched) deep fluorescence maxima along the tracks of southern elephant seals tagged with FCTD-SRDLs over the austral summers spanning 2009 to 2013. These ‘true’ deep maxima compose approximately 30% of all night data collected by these animal-borne fluorometers. The general positions of the Sub Antarctic Front and the Polar front are shown in green and blue, respectively (Orsi and Harris, 2014).
